# Supplementary material
Source: PubMed Central journal article supplement (PMC124448)
Supplement: pnas_99_10_6597__1.pdf [file pnas_99_10_6597__1.pdf]

Table 4. SFR1-SFR3 kinetic data

|                     |    | 5' - TAATACGACTCACTATAGGGAGA                       |                 |                                                    |                       | 5' - TAATACGACTCACTATAGGGAGAN                      |                 |                                                    |                       |           |
|---------------------|----|----------------------------------------------------|-----------------|----------------------------------------------------|-----------------------|----------------------------------------------------|-----------------|----------------------------------------------------|-----------------------|-----------|
|                     |    | 3' - ATTATGCTGAGTGATATCCCTCTXGCTAGGTTACGGCAGGATCGC |                 |                                                    |                       | 3' - ATTATGCTGAGTGATATCCCTCTXGCTAGGTTACGGCAGGATCGC |                 |                                                    |                       |           |
|                     |    | rNTP or dNTP                                       |                 |                                                    |                       |                                                    |                 |                                                    |                       |           |
|                     |    | Single incorporation of dNTP                       |                 |                                                    |                       | Single incorporation of rNTP                       |                 |                                                    |                       |           |
| Template            |    | $k_{cat}$ , min <sup>-1</sup>                      | $K_M$ , $\mu$ M | $k_{cat}/K_M$ , min <sup>-1</sup> ·M <sup>-1</sup> | Relative to wild type | $k_{cat}$ , min <sup>-1</sup>                      | $K_M$ , $\mu$ M | $k_{cat}/K_M$ , min <sup>-1</sup> ·M <sup>-1</sup> | Relative to wild type | dNTP/rNTP |
| <b>Wild type SF</b> | dT | 2.09 ± 0.1                                         | 7.54 ± 3.2      | 2.77 × 10 <sup>5</sup>                             | 1                     | 0.004 ± 0.001                                      | 483 ± 175       | 8.3                                                | 1                     | 33,500    |
|                     | dG | 4.08 ± 0.9                                         | 0.92 ± 0.5      | 4.42 × 10 <sup>6</sup>                             | 1                     | 0.26 ± 0.05                                        | 213 ± 59        | 1.2 × 10 <sup>3</sup>                              | 1                     | 3,700     |
|                     | dC | 2.78 ± 0.6                                         | 0.92 ± 0.1      | 3.03 × 10 <sup>6</sup>                             | 1                     | 0.39 ± 0.07                                        | 257 ± 129       | 1.5 × 10 <sup>3</sup>                              | 1                     | 2,010     |
|                     | dA | 2.79 ± 0.1                                         | 3.29 ± 0.7      | 8.5 × 10 <sup>5</sup>                              | 1                     | 0.004 ± 0.001                                      | 525 ± 90        | 8.0                                                | 1                     | 106,000   |
| <b>SFR1</b>         | dT | 9.27 ± 0.1                                         | 152 ± 22        | 6.1 × 10 <sup>4</sup>                              | 0.22                  | 20.7 ± 0.2                                         | 146 ± 5         | 1.4 × 10 <sup>5</sup>                              | 17,100                | 0.43      |
|                     | dG | 10.2 ± 1.3                                         | 36.4 ± 6.3      | 2.8 × 10 <sup>5</sup>                              | 0.06                  | 21.4 ± 0.3                                         | 30.5 ± 8.3      | 7.0 × 10 <sup>5</sup>                              | 586                   | 0.40      |
|                     | dC | 11.0 ± 0.6                                         | 45.9 ± 3.3      | 2.4 × 10 <sup>5</sup>                              | 0.08                  | 21.6 ± 1.0                                         | 32.5 ± 3.4      | 6.7 × 10 <sup>5</sup>                              | 441                   | 0.36      |
|                     | dA | 12.9 ± 0.2                                         | 88.0 ± 10       | 1.5 × 10 <sup>5</sup>                              | 0.17                  | 15.1 ± 0.1                                         | 144 ± 2.5       | 1.0 × 10 <sup>5</sup>                              | 13,100                | 1.39      |
| <b>SFR2</b>         | dT | 7.63 ± 0.2                                         | 247 ± 8.0       | 3.1 × 10 <sup>4</sup>                              | 0.11                  | 15.6 ± 2.1                                         | 197 ± 5         | 7.9 × 10 <sup>4</sup>                              | 9,570                 | 0.39      |
|                     | dG | 10.9 ± 1.2                                         | 43.8 ± 10       | 2.5 × 10 <sup>5</sup>                              | 0.06                  | 23.7 ± 0.6                                         | 41.5 ± 4.7      | 5.7 × 10 <sup>5</sup>                              | 478                   | 0.43      |
|                     | dC | 9.07 ± 1.6                                         | 53.0 ± 4.0      | 1.7 × 10 <sup>5</sup>                              | 0.06                  | 22.4 ± 2.1                                         | 59.4 ± 10       | 3.8 × 10 <sup>5</sup>                              | 250                   | 0.45      |
|                     | dA | 9.54 ± 0.3                                         | 95.9 ± 5.0      | 1.0 × 10 <sup>5</sup>                              | 0.12                  | 14.6 ± 0.1                                         | 249 ± 1         | 5.9 × 10 <sup>4</sup>                              | 7,320                 | 1.70      |
| <b>SFR3</b>         | dT | 9.30 ± 0.4                                         | 203 ± 45        | 4.6 × 10 <sup>4</sup>                              | 0.17                  | 19.3 ± 0.3                                         | 134 ± 10        | 1.4 × 10 <sup>5</sup>                              | 17,400                | 0.32      |
|                     | dG | 18.7 ± 7.1                                         | 37.6 ± 14       | 5.0 × 10 <sup>5</sup>                              | 0.11                  | 31.0 ± 1.8                                         | 23.6 ± 1.3      | 1.3 × 10 <sup>6</sup>                              | 1,100                 | 0.38      |
|                     | dC | 21.5 ± 7.8                                         | 32.2 ± 11       | 6.7 × 10 <sup>5</sup>                              | 0.22                  | 29.1 ± 1.3                                         | 23.0 ± 0.2      | 1.3 × 10 <sup>6</sup>                              | 839                   | 0.53      |
|                     | dA | 14.6 ± 0.1                                         | 91.5 ± 9.4      | 1.6 × 10 <sup>5</sup>                              | 0.19                  | 21.8 ± 0.3                                         | 225 ± 0.1       | 9.7 × 10 <sup>4</sup>                              | 12,100                | 1.65      |

Assay conditions were as follows: 40 nM template-primer duplex, 0.11–1.34 nM enzyme, 50 mM Tris (pH 7.5), 10 mM MgCl<sub>2</sub>, 1  $\mu$ M DTT, 50  $\mu$ g/ml BSA. The reactions were initiated by adding the DNA–enzyme mixture to an equal volume (5  $\mu$ l) of a 2 $\times$  dNTP or rNTP stock solution, incubated at room temperature for 1–10 min, and quenched by the addition of 20  $\mu$ l loading buffer (95% formamide/20 mM EDTA). A 5- $\mu$ l portion of the reaction mixture was then analyzed by 15% PAGE containing 8 M urea. Data are the average of three independent determinations.
